# Supplementary material for: Synthesis and structures of polyiodide radical cation salts of donors combining tetrathiafulvalene with multiple thiophene or oligo-thiophene substituents
Source: Royal Society of Chemistry journal article supplement (doi:10.1039/d0ce00954g), 2020-01-01
Supplement: d0ce00954g1.pdf [file d0ce00954g1.pdf]

# **Synthesis and Structures of Polyiodide Radical Cation Salts of Donors Combining Tetrathiafulvalene with Multiple Thiophene or Oligo-thiophene Substituents.**

**Jonathan Short, Toby J. Blundell, Songjie Yang, Onur Sahin, Yiana Shakespeare, Emma L. Smith, John D. Wallis\* and Lee Martin\***

## **Supplementary Information.**

- 1. Synthesis of Donors.**
- 2. Synthesis of Radical Cation Salts.**
- 3. Cyclic Voltammetry and Conductivity Measurements.**
- 4. X-ray Crystallography.**

## Experimental

**General.** All chemicals were purchased from Sigma Aldrich and used as received. Solution NMR spectra were measured on a Jeol ECLIPSE 400 spectrometer at 400 MHz for  $^1\text{H}$  and at 100.6 MHz for  $^{13}\text{C}$  using  $\text{CDCl}_3$  as solvent and tetramethylsilane (TMS) as standard unless otherwise stated, and measured in p.p.m. downfield from TMS with coupling constants reported in Hz. IR spectra for donors were recorded on a Perkin Elmer Spectrum 100 FT-IR Spectrometer using Attenuated Total Reflection sampling on solids or oils and are reported in  $\text{cm}^{-1}$ . IR spectra for donor cations were measured on a Nicolet iS50 FR-IR spectrometer using a Specac Golden Gate single diamond ATR. UV-vis spectra were measured on a Agilent Technologies Cary 8454 UV-vis spectrometer. Chemical analysis data were obtained from Mr Stephen Boyer, London Metropolitan University. *Tetrakis*(thiophen-2-ylthio)TTF **15A** was prepared as described.<sup>S1</sup>

**3-Iodothiophene.** *n*-BuLi solution (1.6 M, 34.5 mL, 55.3 mmol) was added dropwise to a solution of 3-bromothiophene (8.20 g, 50.3 mmol) in dry hexane:diethyl ether (75:15 mL) at  $-78\text{ }^\circ\text{C}$ . After stirring for 3 h. at  $-78\text{ }^\circ\text{C}$ , iodine (12.12 g, 47.8 mmol) was added in portions to the reaction mixture. The solution was allowed to warm up to room temperature and stirred overnight. The white mixture was filtered and the solids washed with hexane. The organic phase was washed with  $\text{Na}_2\text{S}_2\text{O}_3$  solution, water (3 x 100 mL) and brine (2 x 50 mL) and was dried over  $\text{MgSO}_4$ . Filtration and evaporation of the solvent gave a brownish oil which was purified by column chromatography with (hexane) to give **2** (9.70 g, 92%) as colourless oily crystals.  $\delta_{\text{H}}$  (400 MHz,  $\text{CDCl}_3$ ): 7.41 (1H, dd,  $J = 3.0, 1.8$  Hz, 2-*H*), 7.20 (1H, dd,  $J = 5.0, 3.0$  Hz, 5-*H*), 7.11 (1H, dd,  $J = 5.0, 1.8$  Hz, 4-*H*);  $^{13}\text{C}$  NMR (100 MHz,  $\text{CDCl}_3$ )  $\delta$  (ppm): 134.7 (4-*C*), 128.6 (2-*C*), 127.3 (5-*C*), 77.1 (3-*C*).

### 4,5-Bis(thiophen-3'-ylthio)-1,3-dithiole-2-thione **14B**.

A mixture of zinc complex **13**<sup>S2</sup> (2.33 g, 3.25 mmol), 3-iodothiophene (3.00 g, 14.3 mmol),  $\text{Cu}_2\text{O}$  (100 mg, 0.65 mmol), ethyl acetoacetate (180  $\mu\text{L}$ , 1.42 mmol), and anhydrous DMF (8 mL) was heated to  $120\text{ }^\circ\text{C}$  and refluxed overnight under  $\text{N}_2$ . Dichloromethane (100 mL) was added to the cooled mixture, which was washed with water (5 x 50 mL). The organic phase was dried over  $\text{MgSO}_4$ , filtered and the solvent was evaporated. The resulting brown oil was purified by column chromatography (petroleum ether : DCM (4:1)) to give **14B** (1.93 g, 82%) as a yellow-orange solid, m.p.  $102\text{-}103\text{ }^\circ\text{C}$ ;  $\delta_{\text{H}}$  (400 MHz,  $\text{CDCl}_3$ ): 7.55 (2H, dd,  $J = 3.0, 1.3$  Hz, 2 x 2'-*H*), 7.42 (2H, dd,  $J = 5.0, 3.0$  Hz, 2 x 5'-*H*), 7.14 (2H, dd,  $J = 5.0, 1.3$  Hz, 2 x 4'-*H*);  $\delta_{\text{H}}$  (400 MHz,  $\text{CDCl}_3$ ): 210.9 (*C=S*), 134.7 (2 x 3'-*C*), 130.6 (2 x 4'-*C*), 130.1 (2 x 2'-*C*), 127.6 (2 x 5'-*C*), 126.4 (4,5-*C*);  $\nu_{\text{max}}/\text{cm}^{-1}$ : 3088, 3086, 3058, 1456, 1389, 1351, 1196, 1051, 1023, 1010, 889, 853, 774, 758, 682. Found: C, 36.21 ; H, 1.58 %. Calc. for  $\text{C}_{11}\text{H}_6\text{S}_7$ : C, 36.44; H, 1.67 %.

#### 4,4',5,5'-Tetrakis(thiophen-3''-ylthio)-tetrathiafulvalene 15B.

Thione **14B** (0.60 g, 1.65 mmol) (2 mL) was stirred in trimethyl phosphite at 90 °C for 12 h. The reaction was left to cool to RT, and the trimethyl phosphite was removed. The reddish oil was purified by column chromatography (petroleum ether : DCM (3:1)) to give **15B** (0.49 g, 90%) as red crystals, m.p. : 211-214 °C;  $\delta_{\text{H}}$  (400 MHz,  $\text{CDCl}_3$ ): 7.40 (4H, dd,  $J = 3.0, 1.3$  Hz, 4 x 2''-H), 7.35 (4H, dd,  $J = 5.0, 3.0$  Hz, 4 x 5''-H), 7.07 (4H, dd,  $J = 5.0, 1.3$  Hz, 4 x 4''-H);  $\delta_{\text{C}}$  (100 MHz,  $\text{CDCl}_3$ ): 130.4 (4 x 4''-C), 128.2 (4 x 2''-C), 127.6 (4-,4''-,5-,5''-C), 127.2 (4 x 3''-C), 126.7 (4 x 5''-C), 109.5 (2-,2''-C);  $\nu_{\text{max}}/\text{cm}^{-1}$ : 3093, 3090, 3086, 1479, 1401, 1395, 1351, 1196, 1095, 1074, 891, 849, 771, 712. Found: C, 40.04; H, 1.74 %. Calc. for  $\text{C}_{22}\text{H}_{12}\text{S}_{12}$ : C, 39.97; H, 1.83 %.

#### 4,5-Bis(2',2''-bithiophen-5'-ylthio)-1,3-dithiole-2-thione, 14C.

Zinc complex **13** (3.76 g, 5.2 mmol) and 2-iodo-2,2'-bithiophene<sup>S3</sup> (7.65 g, 26.2 mmol) with catalyst copper(I) oxide (120 mg) and ligand ethyl acetoacetate (0.3 mL) were heated in DMF (10 mL) for 18 h under nitrogen. The reaction mixture was cooled to room temperature and poured into DCM (100 mL). The resulting mixture was washed with distilled water (3×30 mL) and brine (30 mL) successively and then dried with  $\text{MgSO}_4$ . The product was purified by chromatography (hexane: chloroform, 8:1 gradually changed to 1:1) to give the thione **14C** (4.06 g, 73.6 %) as a yellow-green crystals, m.p. 123-125 °C.  $\delta_{\text{H}}$  (400 MHz,  $\text{CDCl}_3$ ): 7.28 (2H, dd,  $J = 1.1, 5.0$  Hz, 2 × 5''-H), 7.26 (2H, d,  $J = 3.8$  Hz, 2 × 4'-H), 7.21 (2H, dd,  $J = 1.1, 3.7$  Hz, 2 × 3''-H), 7.09 (2H, d,  $J = 3.8$  Hz, 2 × 3'-H), 7.04 (2H, dd,  $J = 3.7, 5.1$  Hz, 2 × 4''-H);  $\delta_{\text{C}}$  (100 MHz,  $\text{CDCl}_3$ ): 210.0 (C=S), 144.4 (2 × 2'-C), 137.6 (2 × 4'-C), 136.0 (2 × 2''-C), 135.4 (4-,5-C), 128.0 (2 × 4''-C), 126.6 (2 × 5'-C), 125.7 (2 × 5''-C), 124.9 (2 × 3''-C), 123.9 (2 × 3'-C);  $\nu_{\text{max}}/\text{cm}^{-1}$ : 3099, 3091, 3080, 3065, 1433, 1414, 1059, 839, 794, 693. Found: C, 43.34; H, 1.76. Calc. for  $\text{C}_{19}\text{H}_{10}\text{S}_9$ : C, 43.32; H, 1.91%.

#### Tetrakis(2'',2''''-bithiophen-5''-ylthio)-TTF, 15C.

Thione **14C** (1.80 g, 2.93 mmol) was heated in trimethyl phosphite (20 mL) to 90 °C under nitrogen for 18 h. The precipitate formed was filtered, and washed with methanol (3 x 20 mL). The solid was stirred with refluxing chloroform for 18 h, filtered and washed with more chloroform and dried *in vacuo* to give **15C** (1.15 g, 68.0 %) as a bright orange powder, m. p. 225-226 °C.  $\delta_{\text{H}}$  (400 MHz,  $\text{THF-d}_8$ ): 7.38 (2H, dd,  $J = 1.1, 5.1$  Hz, 4 × 5''-H), 7.25 (2H, m, 4 × 3''-, 4 × 4'-H), 7.13 (2H, d,  $J = 3.7$  Hz, 4 × 3''-H), 7.02 (2H, dd,  $J = 3.7, 5.2$  Hz, 4 × 4'-H);  $\delta_{\text{C}}$  (100 MHz,  $\text{THF-d}_8$ , 10,000 scans): 144.5 (2 × 2''-C), 137.5 (2 × 4''-C), 137.0 (2 × 2''''-C), 128.3 (2 × 4''''-C), 128.0 (4-,5- or 2 x 5''-C), 126.0 (2 × 5''''-C), 125.1 (2 × 3''''-C), 124.2 (2 × 3''-C);  $\nu_{\text{max}}/\text{cm}^{-1}$ : 3100, 3079, 3070, 1415, 1215, 1199, 885, 839, 824, 799, 767, 706, 692, 684, 532, 486, 466, 452, 412. Found: C, 46.01; H, 1.96. Calc. for  $\text{C}_{38}\text{H}_{20}\text{S}_{16}$ : C, 46.12; H, 2.04%.

#### 4,5-Bis(5''-hexyl-2',2''-bithiophen-5'-ylthio)-1,3-dithiole-2-thione, 14D.

Zinc complex **13** (1.33 g, 1.85 mmol) and 5'-hexyl-5-iodo-2,2'-bithiophene<sup>S4</sup> (3.01 g, 8.00 mmol) with catalyst copper(I) oxide (40 mg) and ligand ethyl acetoacetate (0.2 mL) were heated in DMF (10 mL) to 120 °C for 18 h under nitrogen. The reaction mixture was cooled to room temperature and poured into DCM (100 mL). The resulting mixture was washed with distilled water (3×30 mL) and brine (30 mL) successively and then dried with  $\text{MgSO}_4$ . The

product was purified by chromatography (cyclohexane: chloroform, 2:1) to give the thione as **14D** (1.60 g, 60.8 %) as a yellow powder. m.p. 94-96 °C.  $\delta_{\text{H}}$  (400 MHz,  $\text{CDCl}_3$ ): 7.17 (2H, d,  $J = 3.9$  Hz,  $2 \times 4'$ -H), 6.97 (2H, d,  $J = 3.6$  Hz,  $2 \times 3''$ -H), 6.95 (2H, d,  $J = 3.8$  Hz,  $2 \times 3'$ -H), 6.65 (2H, d,  $J = 3.5$  Hz,  $2 \times 4''$ -H), 2.75 (4H, t,  $J = 7.5$  Hz,  $2 \times \text{Ar-CH}_2$ ), 1.65 (4H, m,  $2 \times \text{CH}_2$ ), 1.35 (4H, m,  $2 \times \text{CH}_2$ ), 1.29 (8H, m,  $4 \times \text{CH}_2$ ), 0.88 (6H, t,  $J = 6.8$  Hz,  $2 \times \text{CH}_3$ );  $\delta_{\text{C}}$  (100 MHz,  $\text{CDCl}_3$ ): 209.8 (C=S), 146.7 ( $2 \times 5''$ -C), 144.9 ( $2 \times 2'$ -C), 137.5 ( $2 \times 4'$ -C), 135.2 (4-,5-C), 133.2 ( $2 \times 2''$ -C), 125.6 ( $2 \times 5'$ -C), 124.8 ( $2 \times 4''$ -C), 124.4 ( $2 \times 3''$ -C), 122.8 ( $2 \times 3'$ -C), 31.4 ( $2 \times \text{CH}_2$ ), 31.3 ( $2 \times \text{CH}_2$ ), 30.0 ( $2 \times \text{CH}_2$ ), 28.6 ( $2 \times \text{CH}_2$ ), 22.4 ( $2 \times \text{CH}_2$ ), 14.0 ( $2 \times \text{CH}_3$ );  $\nu_{\text{max}}/\text{cm}^{-1}$ : 2953, 2918, 2849, 1512, 1459, 1425, 1200, 1051, 978, 885, 870, 808, 781, 719. Found: C, 53.46; H, 4.78. Calc. for  $\text{C}_{31}\text{H}_{34}\text{S}_9$ : C, 53.56; H, 4.93%.

#### **Tetrakis(5'''-hexyl-2'',2'''-bithiophen-5''-ylthio)-TTF, 15D.**

Thione **14D** (0.70 g, 1.00 mmol) in trimethyl phosphite (10 mL) was heated to 90 °C under nitrogen for 18 h. The trimethyl phosphite was evaporated and the residue purified by chromatography (cyclohexane:chloroform 3:1 increasing to 1:1) to give donor **15D** (0.38 g, 57.6 %) as an orange-brown powder, m.p. 168-170 °C.  $\delta_{\text{H}}$  (400 MHz,  $\text{CDCl}_3$ ): 7.14 (4H, d,  $J = 3.7$  Hz,  $4 \times 4''$ -H), 6.98 (4H, d,  $J = 3.6$  Hz,  $4 \times 3''''$ -H), 6.95 (4H, d,  $J = 3.7$  Hz,  $4 \times 3''$ -H), 6.67 (4H, d,  $J = 3.6$  Hz,  $4 \times 4''''$ -H), 2.78 (8H, t,  $J = 7.6$  Hz,  $4 \times \text{Ar-CH}_2$ ), 1.67 (8H, m,  $4 \times \text{CH}_2$ ), 1.37 (8H, m,  $4 \times \text{CH}_2$ ), 1.31 (16H, m,  $8 \times \text{CH}_2$ ), 0.89 (12H, t,  $J = 6.9$  Hz,  $4 \times \text{CH}_3$ );  $\delta_{\text{C}}$  (100 MHz,  $\text{CDCl}_3$ ): 146.4 ( $4 \times 5''''$ -C), 143.9 ( $4 \times 2''$ -C), 136.7 ( $4 \times 4''$ -C), 133.8 ( $4 \times 2''''$ -C), 127.8 (4-,4',-5-,5'-C), 127.1 ( $4 \times 5''$ -C), 124.9 ( $4 \times 4''''$ -C), 124.2 ( $4 \times 3''''$ -C), 122.9 ( $4 \times 3''$ -C), 109.2 (2-,2'-C), 31.5 ( $8 \times \text{CH}_2$ ), 30.1 ( $4 \times \text{CH}_2$ ), 28.7 ( $4 \times \text{CH}_2$ ), 22.5 ( $4 \times \text{CH}_2$ ), 14.1 ( $4 \times \text{CH}_3$ );  $\nu_{\text{max}}/\text{cm}^{-1}$ : 3067, 2956, 2921, 2852, 1509, 1465, 1459, 1426, 1321, 1213, 1194, 973, 887, 870, 797, 785, 766, 734, 723, 656, 509, 452, 420. Found: C, 56.18; H, 5.24 %. Calc. for  $\text{C}_{62}\text{H}_{68}\text{S}_{16}$ : C, 56.15; H, 5.17%.

#### **4,5-Bis(5'''-hexyl-5',2'',5'',2'''-terthiophen-2'-ylthio)-1,3-dithiole-2-thione, 14E.**

Zinc complex **13** (1.07 g, 1.49 mmol) and 5''-hexyl-2-iodo-5,2',5',2''-terthiophene<sup>S5</sup> (3.03 g, 6.61 mmol) with catalyst copper(I) oxide (40 mg) and ligand ethyl acetoacetate (0.2 mL) in DMF (10 mL) were heated to 120 °C for 18 h under nitrogen. After cooling to room temperature, methanol (30 mL) was added and the precipitated solid filtered off and washed with more methanol. The solid was purified by chromatography eluting with chloroform to give the thione **14E** (2.06 g, 79.0 %) as a yellow powder, m.p. 139-141 °C.  $\delta_{\text{H}}$  (400 MHz,  $\text{CDCl}_3$ ): 7.25 (2H, d,  $J = 3.8$  Hz,  $2 \times \text{Ar-H}$ ), 7.08 (2H, d,  $J = 3.8$  Hz,  $2 \times \text{Ar-H}$ ), 7.05 (2H, d,  $J = 3.8$  Hz,  $2 \times \text{Ar-H}$ ), 7.00 (4H, d,  $J = 3.9$  Hz,  $4 \times \text{Ar-H}$ ), 6.68 (2H, d,  $J = 3.6$  Hz,  $2 \times \text{Ar-H}$ ), 2.79 (4H, t,  $J = 7.4$  Hz,  $2 \times \text{Ar-CH}_2$ ), 1.67 (4H, m,  $2 \times \text{CH}_2$ ), 1.38 (4H, m,  $2 \times \text{CH}_2$ ), 1.31 (8H, m,  $4 \times \text{CH}_2$ ), 0.89 (6H, t,  $J = 7.0$  Hz,  $2 \times \text{CH}_3$ );  $\delta_{\text{C}}$  (100 MHz,  $\text{CDCl}_3$ ): 210.1 (C=S), 146.1, 144.2, 138.3, 137.6 (Ar-C<sub>8</sub>), 135.4 (4-,5-C), 133.9, 133.8, 126.4, 125.4, 124.9, 123.8, 123.5, 123.5 (Ar-C<sub>16</sub>), 31.5 ( $4 \times \text{CH}_2$ ), 30.1 ( $2 \times \text{CH}_2$ ), 28.7 ( $2 \times \text{CH}_2$ ), 22.5 ( $2 \times \text{CH}_2$ ), 14.0 ( $2 \times \text{CH}_3$ );  $\nu_{\text{max}}/\text{cm}^{-1}$ : 3066, 2955, 2923, 2853, 1506, 1475, 1447, 1423, 1376, 1210, 1204, 1202, 1056, 1015, 980, 920, 889, 862, 851, 789, 734. Found: C, 54.68; H, 4.29. Calc. for  $\text{C}_{39}\text{H}_{38}\text{S}_{11}$ : C, 54.51; H, 4.46%.

**Tetrakis(5''-hexyl-5'',2'',5'',2''-terthiophen-2''-ylthio) TTF, 15E.**

Thione **14E** (0.92 g, 1.05 mmol) in trimethyl phosphite (20 mL) was heated to 90 °C under nitrogen for 18 h. The trimethyl phosphite was evaporated and the residue washed with methanol and dissolved in hot 1,1,2,2-tetrachloroethane (40 mL) and cooled to room temperature, filtered and washed with 1,1,2,2-tetrachloroethane and chloroform and dried *in vacuo* to give donor **15E** (0.61 g, 69.5 %) as a very poorly soluble pale orange-brown powder, m.p. 234-236 dec. °C.  $\delta_{\text{H}}$  (400 MHz,  $\text{CDCl}_3$ ): 7.08 (4H, d,  $J = 3.3$  Hz,  $4 \times \text{Ar-H}$ ), 6.95 (4H, d,  $J = 3.8$  Hz,  $4 \times \text{Ar-H}$ ), 6.93 (4H, d,  $J = 3.8$  Hz,  $4 \times \text{Ar-H}$ ), 6.86 (8H, d,  $J = 3.6$  Hz,  $8 \times \text{Ar-H}$ ), 6.58 (4H, d,  $J = 3.2$  Hz,  $4 \times \text{Ar-H}$ ), 2.76 (8H, t,  $J = 7.5$  Hz,  $4 \times \text{Ar-CH}_2$ ), 1.66 (8H, m,  $4 \times \text{CH}_2$ ), 1.38 (8H, m,  $4 \times \text{CH}_2$ ), 1.31 (16H, m,  $8 \times \text{CH}_2$ ), 0.89 (12H, t,  $J = 6.9$  Hz,  $4 \times \text{CH}_3$ );  $\nu_{\text{max}}/\text{cm}^{-1}$ : 3065, 2956, 2922, 2853, 1507, 1459, 1445, 1428, 1420, 1414, 1376, 1365, 1220, 1203, 1195, 1067, 1054, 1033, 981, 969, 912, 890, 865, 852, 787, 769, 733, 653, 544, 519, 481, 470, 456. Found: C, 56.47; H, 4.51. Calc. for  $\text{C}_{78}\text{H}_{76}\text{S}_{20}$ : C, 56.62; H, 4.63%.

**4,5-Bis(thiophen-2''-yl)(vinylidithio)TTF 17A.**

Oxo compound **16**<sup>S6</sup> (0.50 g, 2.43 mmol) and thione **14A**<sup>S1</sup> (0.40 g, 0.89 mmol) in trimethyl phosphite (10 mL) were heated together to 90 °C under nitrogen for 18 h. After evaporating the trimethyl phosphite, the oily brown residue was purified by chromatography (cyclohexane:ether, 3:1) to give a red oil which was stirred with a small amount of ether to give the cross-coupled donor **17A** (0.13 g, 22.6 %) as an orange powder, m.p. 93-96 °C.  $^1\text{H}$  NMR (400 MHz,  $\text{CDCl}_3$ ): 7.48 (2H, dd,  $J = 5.2, 1.1$  Hz,  $2 \times 5''\text{-H}$ ), 7.32 (2H, dd,  $J = 3.3, 1.1$  Hz,  $2 \times 3''\text{-H}$ ), 7.04 (2H, m,  $2 \times 4''\text{-H}$ ), 6.49 (2H, s,  $5''\text{-},6''\text{-H}$ );  $^{13}\text{C}$  NMR (100 MHz,  $\text{CDCl}_3$ ): 136.0 ( $2 \times 3''\text{-C}$ ), 131.8 ( $2 \times 5''\text{-C}$ ), 129.5 ( $2 \times 2''\text{-C}$ ), 127.7 ( $2 \times 4''\text{-C}$ ), 127.5 (4-,5-C), 124.5 ( $5''\text{-},6''\text{-C}$ ), 118.9 ( $3''\text{a-},7''\text{a-C}$ ), 115.9, 113.5 ( $2\text{-},2''\text{-C}$ );  $\nu_{\text{max}}$ : 3096, 3078, 3021, 1656, 1562, 1542, 1510, 1397, 1215, 988, 903, 849, 833, 804, 768, 711, 694, 669, 500, 438. Found: C, 36.69; H, 1.44. Calc. for  $\text{C}_{16}\text{H}_8\text{S}_{10}$ : C, 36.90; H, 1.55 %.

**4,5-Bis(thiophen-2''-yl)(ethylenedithio)TTF, 19A.**

Thione **14A**<sup>S1</sup> (1.40 g, 3.86 mmol), and oxo compound **18** (2.01 g, 9.64 mmol) were heated together in trimethyl phosphite at 70 °C under nitrogen for 18 h. After evaporation of trimethyl phosphite, the residue was purified by chromatography, eluting with 1:1 cyclohexane/chloroform, to give the unsymmetrical donor **19A** (0.99 g, 49.0%) as a yellow powder, m.p. 104-106 °C.  $\delta_{\text{H}}$  (400 MHz,  $\text{CDCl}_3$ ): 7.47 (2H, dd,  $J = 1.3, 5.4$  Hz,  $2 \times 5''\text{-H}$ ), 7.31 (2H, dd,  $J = 1.3, 3.7$  Hz,  $2 \times 3''\text{-H}$ ), 7.03 (2H, dd,  $J = 3.6, 5.3$  Hz,  $2 \times 4''\text{-H}$ ), 3.23 (4H, s,  $5''\text{-},6''\text{-H}_2$ );  $\delta_{\text{C}}$  (100 MHz,  $\text{CDCl}_3$ ): 135.9 ( $2 \times 3''\text{-C}$ ), 131.7 ( $2 \times 5''\text{-C}$ ), 129.7 ( $2 \times 2''\text{-C}$ ), 127.7 ( $2 \times 4''\text{-C}$ ), 127.6 (4-,5-C), 113.9 ( $3''\text{a-},7''\text{a-C}$ ), 113.6 & 108.4 ( $2\text{-},2''\text{-C}$ ), 30.1 ( $5''\text{-},6''\text{-C}$ );  $\nu_{\text{max}}/\text{cm}^{-1}$ : 3096, 3084, 3070, 2966, 2927, 1400, 1335, 1284, 1216, 1124, 1084, 1054, 985, 915, 883, 845, 835, 769, 710, 564, 503. Found: C, 36.65; H, 1.91. Calc. for  $\text{C}_{16}\text{H}_{10}\text{S}_{10}$ : C, 36.76; H, 1.93%.

**Bis(2'',2''-bithiophen-5''-ylthio)(ethylenedithio)-TTF, 19C.**

Thione **15C** (1.95 g, 3.70 mmol) and unsubstituted oxo compound **18** (2.07 g, 9.93 mmol) were heated in trimethyl phosphite (30 mL) under nitrogen to 110 °C for 18 h. The reaction mixture was cooled to room temperature then filtered and washed with chloroform. The solvent

and trimethyl phosphite were removed *in vacuo*, and the residue purified by chromatography (cyclohexane:chloroform 2:1) to give donor **19C** (1.14 g, 44.8 %) as a bright orange-pink powder, m.p. 146-148 °C.  $\delta_{\text{H}}$  (400 MHz,  $\text{CDCl}_3$ ): 7.24 (2H, dd,  $J = 1.1, 5.2$  Hz,  $2 \times 5'''$ -H), 7.21 (2H, d,  $J = 3.8$  Hz,  $2 \times 4''$ -H), 7.19 (2H, dd,  $J = 1.1, 3.7$  Hz,  $2 \times 3'''$ -H), 7.07 (2H, d,  $J = 3.8$ ,  $2 \times 3''$ -H), 7.01 (2H, dd,  $J = 3.7, 5.1$ ,  $2 \times 4'''$ -H), 3.20 (4H, s,  $5'$ -, $6'$ - $\text{H}_2$ );  $\delta_{\text{C}}$  (100 MHz,  $\text{CDCl}_3$ ): 143.4 ( $2 \times 2''$ -C), 136.7 ( $2 \times 4''$ -C), 136.4 ( $2 \times 2'''$ -C), 128.0 ( $2 \times 5'''$ -C), 127.9 ( $2 \times 4'''$ -C), 127.6 (4-,5-C), 125.3 ( $2 \times 5'''$ -C), 124.6 ( $2 \times 3'''$ -C), 123.7 ( $2 \times 3''$ -C), 113.9 (3a',7a'-C), 113.1 & 108.7 (2-,2'-C), 30.1 ( $5'$ -, $6'$ -C);  $\nu_{\text{max}}/\text{cm}^{-1}$ : 3010, 3080, 3067, 3031, 2960, 2918, 1418, 1285, 1214, 1196, 893, 883, 835, 824, 799, 772, 696, 534. Found: C, 42.00; H, 2.02 %. Calc. for  $\text{C}_{24}\text{H}_{14}\text{S}_{12}$ : C, 41.95; H, 2.05%.

**Attempted synthesis of 4,5-Bis(5',2'',5'',2''''-terthiophen-2''-ylthio)-1,3-dithiole-2-thione.**

Zinc complex **13** (2.35 g, 3.27 mmol) and 2-iodo-5,2',5',2''-terthiophene<sup>S3</sup> (5.40 g, 14.43 mmol) with catalyst copper(I) oxide (75 mg) and ligand ethyl acetoacetate (0.2 mL) were heated in DMF (10 mL) to 120 °C for 18 h under nitrogen. The precipitate was filtered, and washed with distilled water (3 x 20 mL) and methanol (3 x 20 mL) and dried *in vacuo* to give the mono-substituted thione, 5-(2',2'',5'',2''''-terthiophen-5'-ylthio)-2-thioxo-1,3-dithiole-4-thiol, brown powder, m.p. 163-165 °C, which was highly insoluble in common organic solvents,  $\nu_{\text{max}}/\text{cm}^{-1}$ : 3069, 1421, 1053, 1019, 981, 891, 833, 792, 695, 510, 456. Found: C, 40.38; H, 1.74 %. Calc. for  $\text{C}_{15}\text{H}_8\text{S}_8$ : C, 40.51; H, 1.81%.

**Bis(5'''-hexyl-2'',2''''-bithiophen-5''-ylthio)(ethylenedithio)-TTF, 19D.**

Thione **14D** (0.70 g, 0.98 mmol) in trimethyl phosphite (10 mL) was heated to 90 °C under nitrogen for 18 h. The trimethyl phosphite was evaporated and the residue purified by chromatography (cyclohexane:chloroform 3:1 increasing to 1:1) to give donor **19D** (0.38 g, 57.6 %) as a bright pale orange powder, m.p. 97-99 °C.  $\delta_{\text{H}}$  (400 MHz,  $\text{CDCl}_3$ ): 7.18 (2H, d,  $J = 3.7$  Hz,  $2 \times 4''$ -H), 7.01 (2H, d,  $J = 3.6$  Hz,  $2 \times 3'''$ -H), 6.98 (2H, d,  $J = 3.7$  Hz,  $2 \times 3''$ -H), 6.69 (2H, d,  $J = 3.6$  Hz,  $2 \times 4'''$ -H), 3.20 (4H,  $2 \times 5',6'$ -H), 2.79 (4H, t,  $J = 7.6$  Hz,  $2 \times \text{Ar-CH}_2$ ), 1.67 (4H, m,  $2 \times \text{CH}_2$ ), 1.37 (4H, m,  $2 \times \text{CH}_2$ ), 1.31 (8H, m,  $4 \times \text{CH}_2$ ), 0.89 (6H, t,  $J = 6.8$  Hz,  $2 \times \text{CH}_3$ );  $\delta_{\text{C}}$  (100 MHz,  $\text{CDCl}_3$ ): 146.4 ( $2 \times 5'''$ -C), 144.1 ( $2 \times 2''$ -C), 136.8 ( $2 \times 4''$ -C), 133.8 ( $2 \times 2'''$ -C), 127.6 (4-,5-C), 127.1 ( $2 \times 5''$ -C), 124.9 ( $2 \times 4'''$ -C), 124.3 ( $2 \times 3'''$ -C), 122.9 ( $2 \times 3''$ -C), 113.9 (3a',7a'-C), 113.4 & 108.4 (2'-,2-C), 31.5 ( $2 \times \text{CH}_2$ ), 30.1 ( $2 \times \text{CH}_2$ ), 30.0 ( $2 \times \text{CH}_2$ ), 28.7 ( $2 \times \text{CH}_2$ ), 22.5 ( $2 \times \text{CH}_2$ ), 14.1 ( $2 \times \text{CH}_3$ );  $\nu_{\text{max}}/\text{cm}^{-1}$ : 3066, 2954, 2924, 2850, 1510, 1459, 1424, 1213, 1040, 989, 969, 889, 870, 799, 771. Found: C, 50.48; H, 4.39. Calc. for  $\text{C}_{36}\text{H}_{38}\text{S}_{12}$ : C, 50.55; H, 4.48%.

**Bis(5''''-hexyl-5'',2''',5''',2''''-terthiophen-2''-ylthio) (ethylenedithio)TTF, 19E.**

Thione **14E** (1.11 g, 3.70 mmol) and unsubstituted oxo compound **18** (0.70 g, 9.93 mmol) were heated with trimethyl phosphite (20 mL) under nitrogen to 110 °C for 18 h. After evaporation of trimethyl phosphite, the residue was purified by chromatography eluting with cyclohexane/chloroform (2:1 changing to 1:1) to give donor **19E** (0.50 g, 38.7 %) as an orange powder, m.p. 144-146 °C.  $\delta_{\text{H}}$  (400 MHz,  $\text{CDCl}_3$ ): 7.21 (2H, d,  $J = 3.8$  Hz,  $2 \times \text{Ar-H}$ ), 7.07 (2H,

d,  $J = 3.8$  Hz,  $2 \times \text{Ar-H}$ ), 7.04 (2H, d,  $J = 3.8$  Hz,  $2 \times \text{Ar-H}$ ), 6.99 (2H, d,  $J = 3.8$  Hz,  $2 \times \text{Ar-H}$ ), 6.98 (2H, d,  $J = 3.5$  Hz,  $2 \times \text{Ar-H}$ ), 6.68 (2H, d,  $J = 3.5$  Hz,  $2 \times \text{Ar-H}$ ), 3.22 (4H, s,  $5',6'-\text{H}$ ), 2.79 (4H, t,  $J = 7.5$  Hz,  $2 \times 5''''-\text{CH}_2$ ), 1.66 (4H, m,  $2 \times \text{CH}_2$ ), 1.37 (4H, m,  $6 \times \text{CH}_2$ ), 1.31 (8H, m,  $6 \times \text{CH}_2$ ), 0.89 (6H, t,  $J = 7.0$  Hz,  $2 \times \text{CH}_3$ );  $\delta_{\text{C}}$  (100 MHz,  $\text{CDCl}_3$ ): 145.9, 143.3, 137.8 (Ar- $\text{C}_6$ ), 136.8 (4-,5-C), 134.3, 134.1, 127.9, 127.8, 125.2, 124.8, 123.6, 123.5, 123.4 (Ar- $\text{C}_{18}$ ), 113.9 (2-C), 113.2 (3a'-,7a'-C), 108.7 (2'-C), 31.5 (4 x  $\text{CH}_2$ ), 30.2 (2 x  $\text{CH}_2$ ), 30.1 (5'-,6'-C), 28.7 (2 x  $\text{CH}_2$ ), 22.5 (2 x  $\text{CH}_2$ ), 14.0 ( $\text{CH}_3$ );  $\nu_{\text{max}}/\text{cm}^{-1}$ : 3066, 2955, 2918, 2872, 2851, 1508, 1466, 1459, 1447, 1422, 1408, 892, 849, 791, 765, 733, 723, 682, 479, 465 Found: C, 51.39; H, 3.97. Calc. for  $\text{C}_{44}\text{H}_{42}\text{S}_{14}$ : C, 51.83; H, 4.15%.

### UV-Vis Spectra for donors.

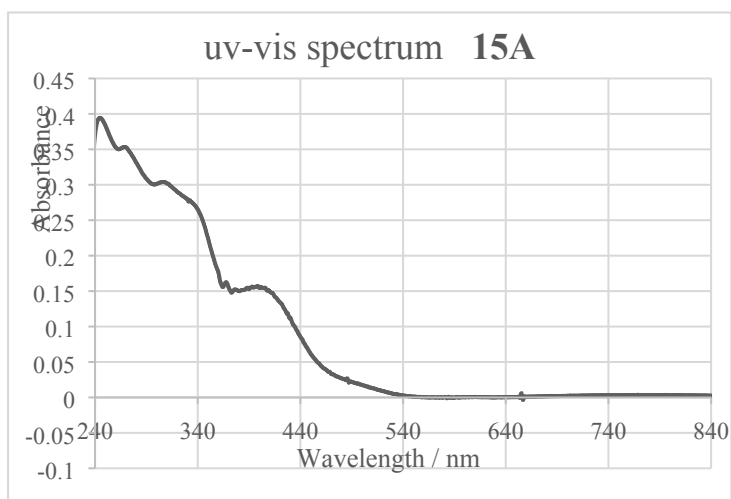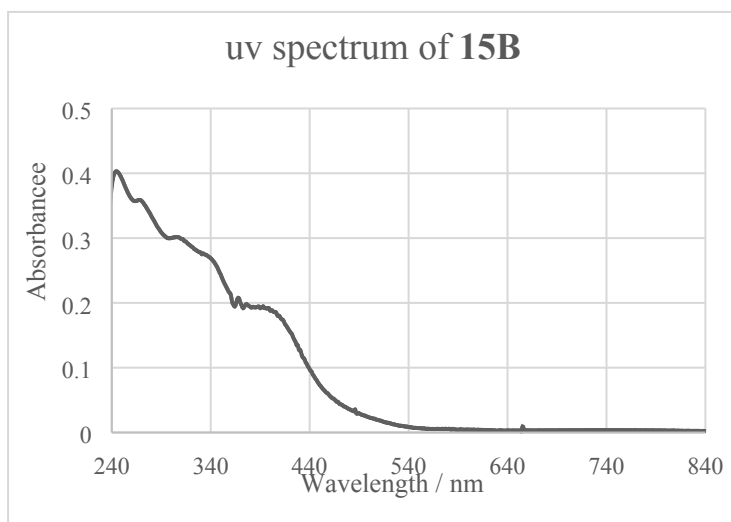

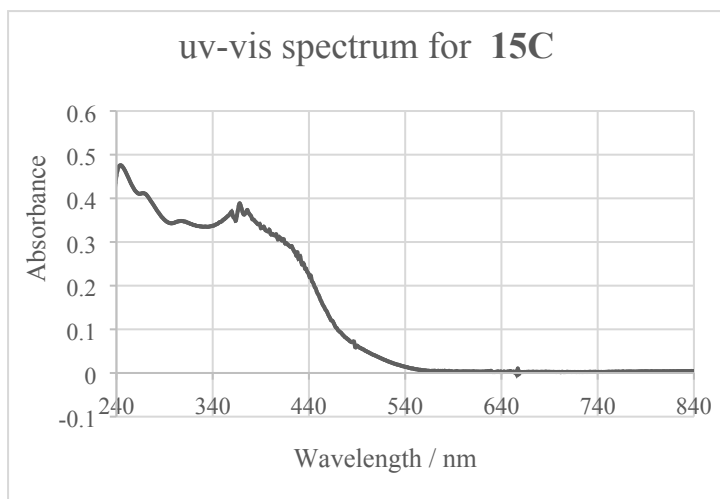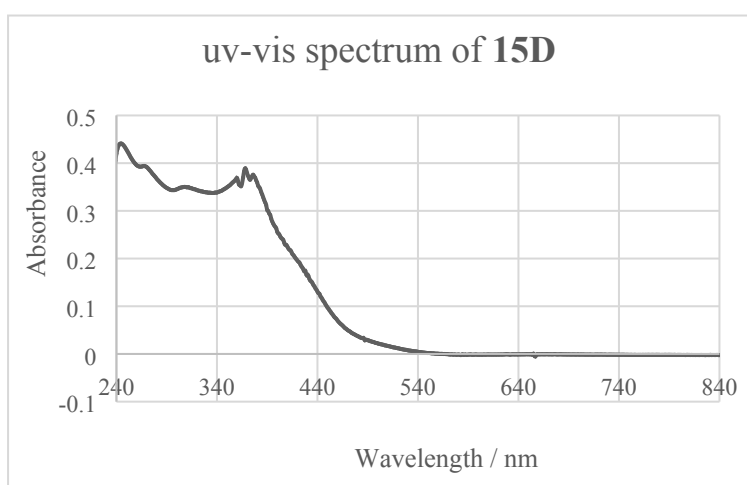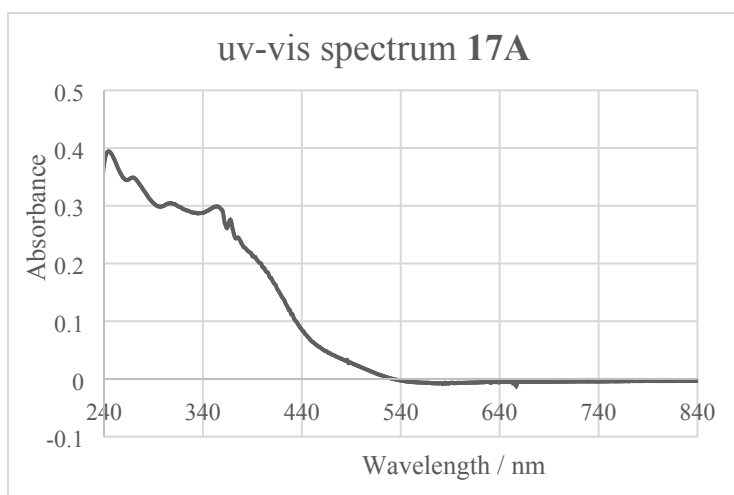



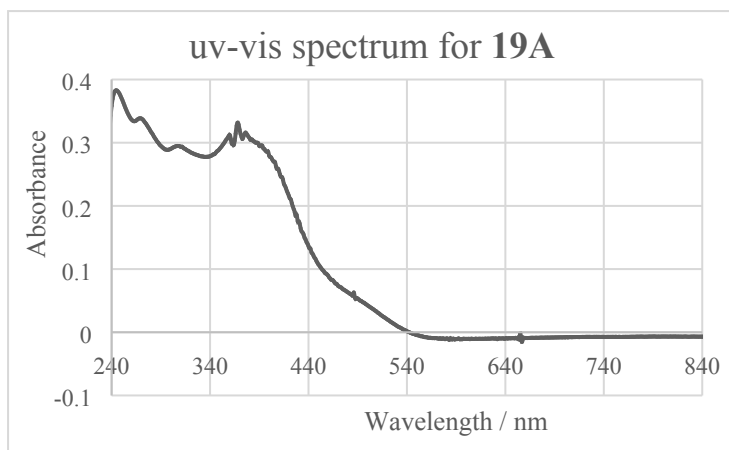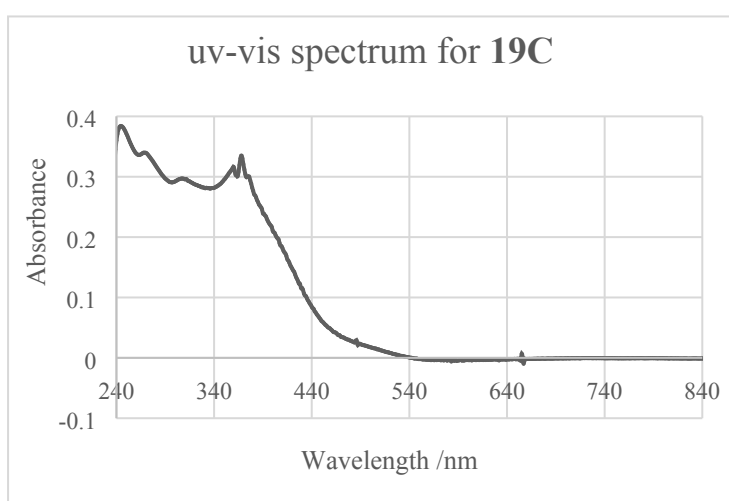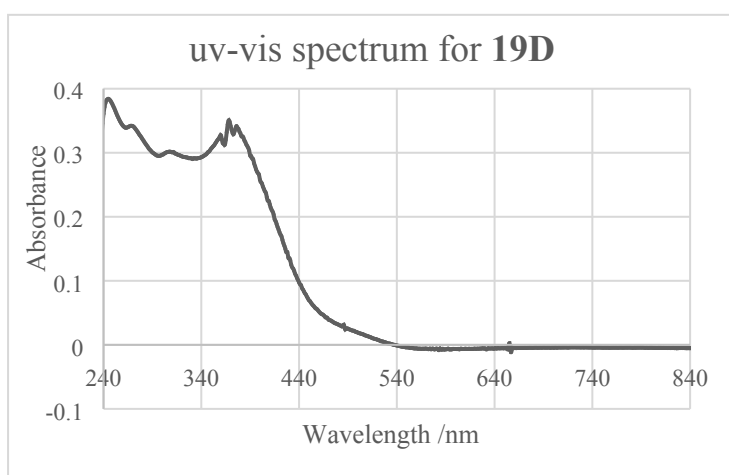

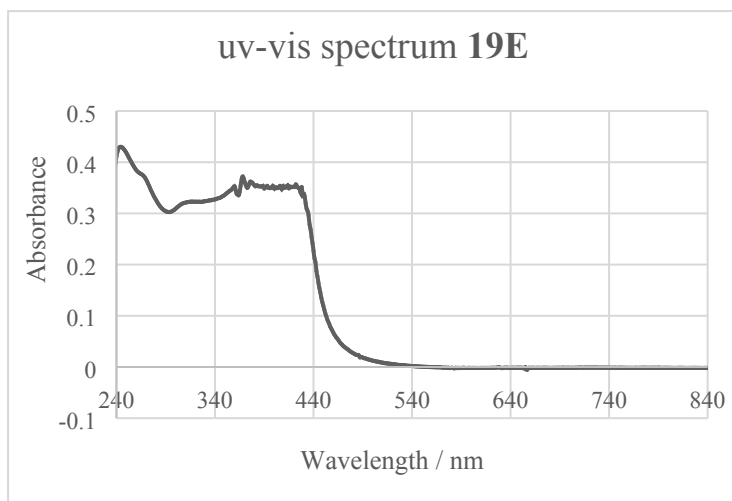

**Figure S1.** Ultra-violet/visible spectra of donors **15A-15D**, **17A**, **19A** and **19C-19E**.

### Radical Cation Salts.

Single crystals of radical cation salts were grown by slow diffusion as follows:

**Synthesis of  $15A.I_5$ .** Iodine (10 mg,  $3.94 \times 10^{-2}$  mmol) in hexane (5 mL) was layered over donor **15A** (5 mg,  $7.5 \times 10^{-3}$  mmol) in DCM (5 mL) and left to diffuse over a period of one week. Large black rhombohedral crystals of  $15A.I_5$  were collected.  $\nu_{\max}/\text{cm}^{-1}$ : 3090, 3077, 1411, 1409, 1324, 1281, 1214, 1171, 1130, 1078, 1050, 1019, 985, 915, 886, 845, 810, 708.

**Synthesis of  $15B.I_5$ .** Iodine (10.1 mg,  $3.96 \times 10^{-2}$  mmol) in hexane (3 mL) was layered over donor **15B** (5 mg,  $7.58 \times 10^{-3}$  mmol) in DCM (3 mL) with layers of DCM (2 mL) and hexane (2 mL) layered in between. After 5 days some small black crystalline blocks of  $15B.I_5$  were collected.  $\nu_{\max}/\text{cm}^{-1}$ : 3089, 3076, 1403, 1392, 1329, 1198, 1095, 1076, 1026, 920, 889, 854, 808, 766, 683.

**Synthesis of  $17A.I_3.1.5I_2$ .** Iodine (10.36 mg,  $3.94 \times 10^{-2}$  mmol) in hexane (3 mL) was layered over donor **17A** (7.2 mg,  $1.38 \times 10^{-2}$  mmol) in DCM (3 mL) with hexane (2 mL) layered between and left to diffuse. After 5 days thin black plates of  $17A.I_3.1.5I_2$  were collected.  $\nu_{\max}/\text{cm}^{-1}$ : 3092, 3077, 1413, 1393, 1327, 1224, 1209, 1096, 1078, 1054, 1014, 986, 969, 890, 844, 769, 705.

**Synthesis of  $(19A)_2.I_5.I_3$ .** Iodine (10 mg  $3.94 \times 10^{-2}$  mmol) in hexane (5 mL) was layered over donor **19A** (5 mg,  $9.58 \times 10^{-3}$  mmol) in DCM (5 mL) and left to diffuse over a period of 3 days. Black needle crystals of  $(19A)_2.I_5.I_3$  were collected.  $\nu_{\max}/\text{cm}^{-1}$ : 3070, 2959, 1445, 1411, 1393, 1324, 1281, 1266, 1214, 1175, 1130, 1082, 1055, 1019, 981, 915, 886, 845, 807, 708.

**Synthesis of  $19A.I_3$ .** Black block crystals of this salt were collected from the same experiment as  $(19A)_2.I_5.I_3$ .  $\nu_{\max}/\text{cm}^{-1}$ : 3089, 3073, 1449, 1412, 1393, 1328, 1281, 1226, 1175, 1081, 1059,

1019, 986, 885, 845, 713, 700.

**Synthesis of  $\mathbf{19C} \cdot \mathbf{I}_5 \cdot 0.5\mathbf{I}_2$ .** Iodine (10 mg,  $3.94 \times 10^{-2}$  mmol) in hexane (5 mL) was layered over donor **19C** (5 mg,  $7.29 \times 10^{-3}$  mmol) in DCM (5 mL) and left to diffuse over a period of 4 weeks. Large black crystalline plates of  $\mathbf{19C} \cdot \mathbf{I}_5 \cdot 0.5\mathbf{I}_2$  were collected.

**Cyclic voltammetry measurements.** Electrochemical investigations using cyclic voltammetry were carried out using a  $\mu$ -Autolab III potentiostat controlled with GPES software. A three-electrode system was used consisting of a platinum disk working electrode (3 mm diameter), a platinum foil counter electrode and a silver/silver chloride reference electrode. The working electrode was polished with 0.5  $\mu\text{m}$  alumina paste, rinsed and dried prior to all measurements. All voltammograms were performed at ambient temperature ( $\sim 20^\circ\text{C}$ ) and the solution was degassed with nitrogen for 10 min prior to the measurement. Measurements were taken in a solution containing approximately 0.01 mM of the donor in 0.1M tetrabutylammonium hexafluorophosphate/DCM at a scan rate of  $100 \text{ mV s}^{-1}$ .

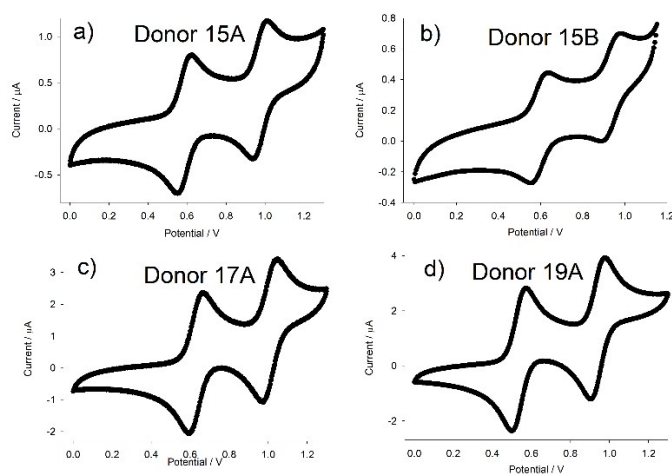

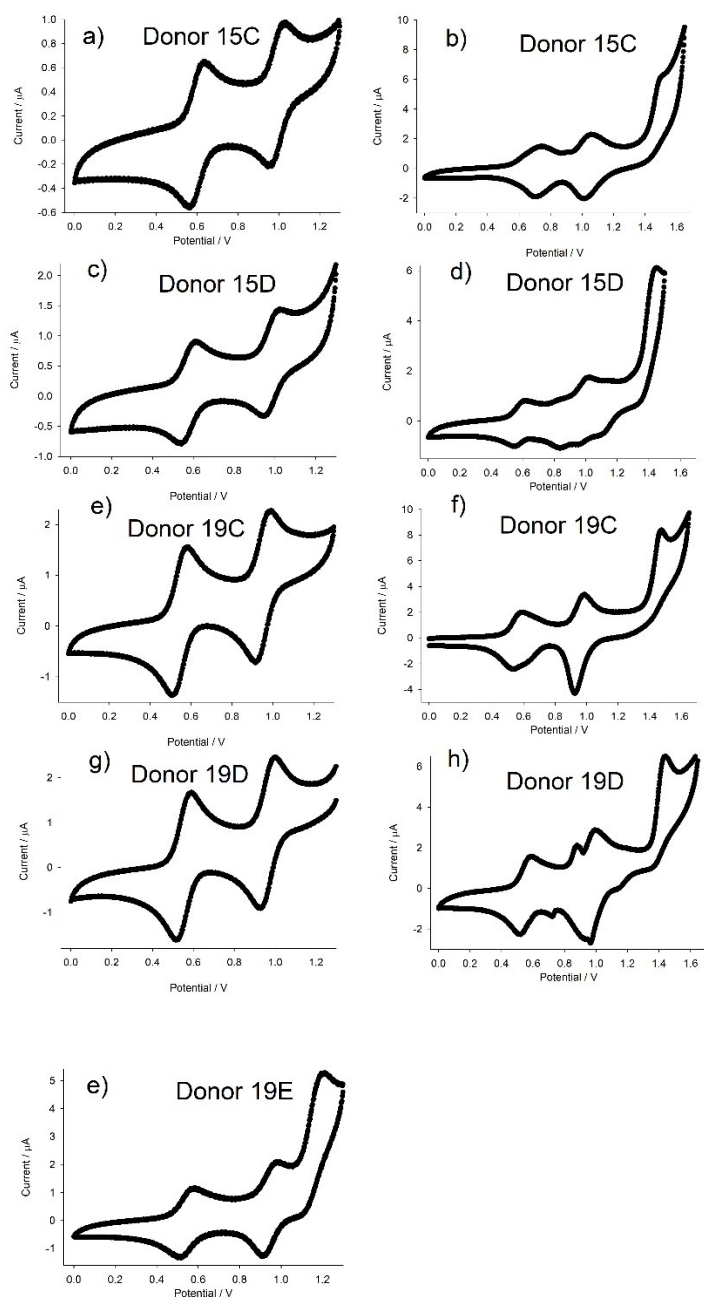

**Figure S2.** Cyclic voltammograms for 15A-15D, 17A, 19A and 19C-19E.

### Conductivity measurements.

Two-probe DC transport measurements were made on several crystals of each radical-cation salt. Gold wires (15  $\mu\text{m}$  diameter) were attached to the crystal, and the attached wires were connected to an eight-pin integrated circuit plug with carbon conductive cement. Measurements at room temperature for all six radical-cation salts shows that all of them have

a room temperature resistance too high to be measured using a Keithley 2401 digital multimeter (>200 MOhms).

### Single Crystal X-ray Diffraction

X-ray single crystal diffraction measurements were performed using a Rigaku Oxford Diffraction Excalibur System equipped with a Sapphire detector at 150 K using CrysAlisPro software.<sup>S7</sup> All non-H atoms were located using direct methods<sup>S8</sup> and difference Fourier syntheses. Hydrogen atoms were placed and refined using a geometric riding model. All fully occupied non-H atoms were refined with anisotropic displacement parameters, unless otherwise specified. Crystal structures were solved and refined using the Olex2 software package<sup>S9</sup> with SHELXL<sup>S10</sup> (structure refinement) and SHELXS or SHELXT<sup>S11</sup> (structure solution). CIF files were checked using checkCIF,<sup>S12</sup> CCDC 2011618-2011623 contains the supplementary data for compounds **15A**.I<sub>5</sub>, **15B**.I<sub>5</sub>, **17A**.I<sub>3</sub>.1.5I<sub>2</sub>, **19A**.I<sub>5</sub>.I<sub>3</sub>, **19A**.I<sub>3</sub> and **19C**.I<sub>5</sub>.0.5I<sub>2</sub>. The data can be obtained free of charge from The Cambridge Crystallographic Data Centre via [www.ccdc.cam.ac.uk/data\\_request/cif](http://www.ccdc.cam.ac.uk/data_request/cif). Molecular illustrations were prepared with Mercury.<sup>S13</sup>

### References.

- S1. J. Sun, X. Lu, J. Shao, Z. Cui, Y. Shao, G. Jiang, W. Yu and X. Shao, *RSC Advances*, 2013, **3**, 11093-10196.
- S2. C. Wang, A. S. Batsanov, M. R. Bryce and J. A. K. Howard, *Synthesis*, 1998, 1615-1618.
- S3. U. Boas, A. Dhanabalan, D. R. Greve and E. W. Meijer, *Synlett*, 2001, **5**, 634-636.
- S4. Q. Meng, J. Gao, R. Li, L. Jiang, C. Wang, H. Zhao, C. Liu, H. Li and W. Hu, *J. Mater. Chem.*, 2009, **19**, 1477-1482.
- S5. M. Funahashi and J.-I. Hanna, *Adv. Mater.*, 2005, **17**, 594-598.
- S6. T. Nakamura, S. Iwasaka, H. Nakano, K. Inoue, T. Nogami and H. Mikawa, *Bull. Chem. Soc. Jpn*, 1987, **60**, 365-368; J. Garin, R. Andreu, J. Orduna and J. Royo, *Synth. Met.*, 2001, **120**, 749-750.
- S7. Agilent (2014). CrysAlis PRO. Agilent Technologies Ltd, Yarnton, Oxfordshire, England.
- S8. G. M. Sheldrick, *Acta Crystallogr. Sect. A: Found. Crystallogr.*, **2008**, *64*, 112-122.
- S9. 10 a) O. V. Dolomanov, L. J. Bourhis, R. J. Gildea, J. A. K. Howard, H. Puschmann, *J. Appl. Crystallogr.*, **2009**, *42*, 339-341; b) O. V. Dolomanov, A. J. Blake, N. R. Champness, M. Schroder, *J. Appl. Crystallogr.*, **2003**, *36*, 1283-1284.
- S10. G. M. Sheldrick, *Acta Crystallogr. Sect. C Struct. Chem.* **2015**, *71*, 3-8.
- S11. G. M. Sheldrick, *Acta Crystallogr. Sect. A Found. Crystallogr.* **2015**, *71*, 3-8.
- S12. <http://checkcif.iucr.org>.
- S13. C. F. Macrae, P. R. Edgington, P. McCabe, E. Pidcock, G. P. Shields, R. Taylor, M. Towler, J. van de Streek, *J. Appl. Cryst.*, **2006**, *39*, 453-457.
